# Supplementary material for: A DFT and KMC based study on the mechanism of the water gas shift reaction on the Pd(100) surface
Source: Royal Society of Chemistry journal article supplement (doi:10.1039/c9cp05476f), 2020-01-01
Supplement: c9cp05476f1.pdf [file c9cp05476f1.pdf]

## **A DFT and KMC Based Study on the Mechanism of Water Gas Shift Reaction on Pd(100) Surface**

Arunabhram Chutia<sup>1,2\*</sup>, Adam Thetford<sup>2,3,4</sup>, Michail Stamatakis<sup>5</sup>, C. Richard A. Catlow<sup>2,4,6\*</sup>

<sup>1</sup>School of Chemistry, Brayford Pool, University of Lincoln, Lincoln, LN6 7TS United Kingdom

<sup>2</sup>UK Catalysis Hub, RCaH, Rutherford Appleton Laboratory, Didcot, OX11 0FA, United Kingdom

<sup>3</sup>Department of Chemistry, University of Manchester, United Kingdom

<sup>4</sup>Department of Chemistry, University College London, Gordon Street, London, WC1H 0AJ, United Kingdom

<sup>5</sup>Department of Chemical Engineering, University College London, Torrington Place, London, WC1E 7JE, United Kingdom

<sup>6</sup>Cardiff Catalysis Institute, School of Chemistry, Cardiff University, Cardiff, CF10 3AT, United Kingdom

Email: [achutia@lincoln.ac.uk](mailto:achutia@lincoln.ac.uk) and [c.r.a.catlow@ucl.ac.uk](mailto:c.r.a.catlow@ucl.ac.uk)

**Table S1.** the interaction energies using DFT on two adjacent molecules (both for the same or for different species) on the same surface.

| Adsorbed             | Interaction energy |
|----------------------|--------------------|
| CO + O               | 0.196              |
| CO + OH              | 0.107              |
| OH + H               | 0.043              |
| O + H                | 0.368              |
| H <sub>2</sub> O + O | 0.354              |
| H + H                | 0.077              |
| (CO+ CO)bb           | 0.128              |
| (CO+ CO) b4          | 0.103              |
| (CO +CO) bt(bb)      | 0.067              |

**Table S2.** The energy barriers for the forward and reverse reactions and the  $\Delta E_{\text{reaction}}$

| Steps | eV    |       | $\Delta E_{\text{reaction}}$ |
|-------|-------|-------|------------------------------|
|       | Ef    | Er    |                              |
| 1     | 1.320 | 0.240 | 1.080                        |
| 2     | 0.880 | 1.410 | -0.530                       |
| 3     | 0.320 | 0.350 | -0.030                       |
| 4     | 0.810 | 0.018 | 0.792                        |
| 5     | 0.690 | 0.439 | 0.251                        |
| 6     | 0.720 | 1.471 | -0.751                       |
| 7     | 0.540 | 0.850 | -0.310                       |
